# Supplementary material for: Factors influencing GPs’ perception of specialised palliative homecare (SPHC) importance – results of a cross-sectional study
Source: PubMed Central journal article supplement (PMC7401213; doi:10.1186/s12904-020-00603-3), 2020-08-03
Supplement: 12904_2020_603_MOESM2_ESM.pdf [file 12904_2020_603_MOESM2_ESM.pdf]

## GP survey on palliative care activity to gain insight into the interrelation of PPC and SPHC

### Advice for filling in the questionnaire:

- Only use a pen (no pencil).
- Clearly place a mark in the box of your answer:
- In case of a falsely marked box, fill in the box completely  and mark your right choice again:

|     |                                                                                           |                                                                                                                                                                                                                                                                                                                                                                                                                       |
|-----|-------------------------------------------------------------------------------------------|-----------------------------------------------------------------------------------------------------------------------------------------------------------------------------------------------------------------------------------------------------------------------------------------------------------------------------------------------------------------------------------------------------------------------|
| A01 | How old are you?                                                                          | <input type="text"/>                                                                                                                                                                                                                                                                                                                                                                                                  |
| A02 | Select your gender:                                                                       | <input type="checkbox"/> female <input type="checkbox"/> male                                                                                                                                                                                                                                                                                                                                                         |
| A03 | For how long have you been working as a physician in the outpatient sector (in years)?    | <input type="text"/> years (incl. further medical education)                                                                                                                                                                                                                                                                                                                                                          |
| A04 | Are you working in a single practice or in a collaborative form?                          | <input type="checkbox"/> <sub>1</sub> single-handed practice<br><input type="checkbox"/> <sub>2</sub> group practice<br><input type="checkbox"/> <sub>3</sub> medical care centre                                                                                                                                                                                                                                     |
| A05 | Are you working as an employee?                                                           | <input type="checkbox"/> yes <input type="checkbox"/> no                                                                                                                                                                                                                                                                                                                                                              |
| A06 | To which Association of Statutory Health Insurance Physicians (KV) do you belong?         | <input type="checkbox"/> <sub>1</sub> Bavaria <input type="checkbox"/> <sub>5</sub> Saxony-Anhalt<br><input type="checkbox"/> <sub>2</sub> Berlin <input type="checkbox"/> <sub>6</sub> Schleswig-Holstein<br><input type="checkbox"/> <sub>3</sub> Hesse <input type="checkbox"/> <sub>7</sub> Thuringia<br><input type="checkbox"/> <sub>4</sub> Lower-Saxony <input type="checkbox"/> <sub>8</sub> Westfalia Lippe |
| A07 | In which region is your practice located?                                                 | <input type="checkbox"/> <sub>1</sub> Rural ( $\leq 5,000$ inhabitants)<br><input type="checkbox"/> <sub>2</sub> Small town ( $> 5,000 - 20,000$ inhabitants)<br><input type="checkbox"/> <sub>3</sub> Medium-sized Town ( $> 20,000 - 100,000$ inhabitants)<br><input type="checkbox"/> <sub>4</sub> Big city ( $> 100,000$ inhabitants)                                                                             |
| A08 | How many hours do you work on average per week? (approximately)                           | <input type="text"/>                                                                                                                                                                                                                                                                                                                                                                                                  |
| A09 | How many patients do you have on average per quarter? (approximately)                     | <input type="text"/>                                                                                                                                                                                                                                                                                                                                                                                                  |
| A10 | How many home visits do you perform per week? (approximately)                             | <input type="text"/>                                                                                                                                                                                                                                                                                                                                                                                                  |
| A11 | How many palliative patients do you have per year? (approximately)                        | <input type="text"/>                                                                                                                                                                                                                                                                                                                                                                                                  |
| A12 | How many home visits do you perform for palliative patients in a quarter? (approximately) | <input type="text"/>                                                                                                                                                                                                                                                                                                                                                                                                  |

|     |                                                                                                                                                                                                                                                                                |                                                                                                                                                                                                                                                                                                                                                                                             |
|-----|--------------------------------------------------------------------------------------------------------------------------------------------------------------------------------------------------------------------------------------------------------------------------------|---------------------------------------------------------------------------------------------------------------------------------------------------------------------------------------------------------------------------------------------------------------------------------------------------------------------------------------------------------------------------------------------|
| A13 | <b>Contact with palliative care:</b><br>In which ways have you had contact with palliative care during your medical practice so far? (Multiple selection possible)                                                                                                             |                                                                                                                                                                                                                                                                                                                                                                                             |
|     | <input type="checkbox"/> _1 none<br><input type="checkbox"/> _2 previously working in a palliative care institution for at least 3 months<br><input type="checkbox"/> _3 40-hour course certificate<br><input type="checkbox"/> _4 additional qualification in palliative care | <input type="checkbox"/> _5 BQKPMV- Physician<br><input type="checkbox"/> _6 current participation in a specialised palliative homecare-Team (SPHC)<br><input type="checkbox"/> _7 settlement via selective contracts for palliative care (§73b/140a SGB V, i.e. integrated care, palliative networks, etc.)<br><input type="checkbox"/> _8 exclusively within the work in general practice |

| How much do you agree with each of the following statements?<br>Please mark your answer. |                                                                  |                          |                          |                          |                          |
|------------------------------------------------------------------------------------------|------------------------------------------------------------------|--------------------------|--------------------------|--------------------------|--------------------------|
| The care of seriously ill and dying patients...                                          |                                                                  | strongly disagree        |                          | strongly agree           |                          |
| B01                                                                                      | ...should be a central part of GPs' work.                        | <input type="checkbox"/> | <input type="checkbox"/> | <input type="checkbox"/> | <input type="checkbox"/> |
| B02                                                                                      | ...is considerably facilitated by the involvement of caregivers. | <input type="checkbox"/> | <input type="checkbox"/> | <input type="checkbox"/> | <input type="checkbox"/> |
| B03                                                                                      | ...should be coordinated by the general practitioner.            | <input type="checkbox"/> | <input type="checkbox"/> | <input type="checkbox"/> | <input type="checkbox"/> |
| B04                                                                                      | ...should be a multi-professional and interdisciplinary field.   | <input type="checkbox"/> | <input type="checkbox"/> | <input type="checkbox"/> | <input type="checkbox"/> |
| B05                                                                                      | ...should be continuously supported by GPs until death.          | <input type="checkbox"/> | <input type="checkbox"/> | <input type="checkbox"/> | <input type="checkbox"/> |
| B06                                                                                      | ...should be a field of palliative specialists (except GPs).     | <input type="checkbox"/> | <input type="checkbox"/> | <input type="checkbox"/> | <input type="checkbox"/> |

| As a general practitioner, I feel secure in ... |                                                                                                                               |                          |                          |                          |                          |
|-------------------------------------------------|-------------------------------------------------------------------------------------------------------------------------------|--------------------------|--------------------------|--------------------------|--------------------------|
|                                                 |                                                                                                                               | never                    |                          | always                   |                          |
| C01                                             | ...identifying palliative patients.                                                                                           | <input type="checkbox"/> | <input type="checkbox"/> | <input type="checkbox"/> | <input type="checkbox"/> |
| C02                                             | ...adapting the therapy to the palliative situation of the patients.                                                          | <input type="checkbox"/> | <input type="checkbox"/> | <input type="checkbox"/> | <input type="checkbox"/> |
| C03                                             | ...starting to talk with patients about their poor prognosis.                                                                 | <input type="checkbox"/> | <input type="checkbox"/> | <input type="checkbox"/> | <input type="checkbox"/> |
| C04                                             | ...dealing with "difficult" relatives of patients.                                                                            | <input type="checkbox"/> | <input type="checkbox"/> | <input type="checkbox"/> | <input type="checkbox"/> |
| C05                                             | ...reducing/ending therapies in the final phase.                                                                              | <input type="checkbox"/> | <input type="checkbox"/> | <input type="checkbox"/> | <input type="checkbox"/> |
| C06                                             | ...performing technical treatment measures (e.g. flushing of port systems).                                                   | <input type="checkbox"/> | <input type="checkbox"/> | <input type="checkbox"/> | <input type="checkbox"/> |
| C07                                             | ...working together with other health care professionals (SPHC team, etc.).                                                   | <input type="checkbox"/> | <input type="checkbox"/> | <input type="checkbox"/> | <input type="checkbox"/> |
| C08                                             | ...accepting and supporting the preferences of the patients concerning therapeutic decisions.                                 | <input type="checkbox"/> | <input type="checkbox"/> | <input type="checkbox"/> | <input type="checkbox"/> |
| C09                                             | ...timely handing over of the patient to specialised palliative care structures when a transgression of competence threatens. | <input type="checkbox"/> | <input type="checkbox"/> | <input type="checkbox"/> | <input type="checkbox"/> |
| C10                                             | ...withstand emotional and stressful situations.                                                                              | <input type="checkbox"/> | <input type="checkbox"/> | <input type="checkbox"/> | <input type="checkbox"/> |
| C11                                             | <b>Please assess your overall palliative competence/expertise.</b>                                                            |                          |                          |                          |                          |
|                                                 |                                                                                                                               | bad                      |                          | good                     |                          |
|                                                 |                                                                                                                               | <input type="checkbox"/> | <input type="checkbox"/> | <input type="checkbox"/> | <input type="checkbox"/> |

| <b>Palliative infrastructure: Is the healthcare provider below available in the setting of your office?</b><br><b>If yes, please assess the quality of the care.</b> |                                                                                                | Availability <sub>1</sub> |                          |                          | If available and used at least once, assess the quality of care. <sub>2</sub> |                       |                       |                       |
|----------------------------------------------------------------------------------------------------------------------------------------------------------------------|------------------------------------------------------------------------------------------------|---------------------------|--------------------------|--------------------------|-------------------------------------------------------------------------------|-----------------------|-----------------------|-----------------------|
|                                                                                                                                                                      |                                                                                                | unknown                   | yes                      | no                       |                                                                               |                       |                       |                       |
| D01                                                                                                                                                                  | own, non-medical employee for palliative medical home visits (“VERAH”/“NÄPA”)                  |                           | <input type="checkbox"/> | <input type="checkbox"/> | <input type="radio"/>                                                         | <input type="radio"/> | <input type="radio"/> | <input type="radio"/> |
| D02                                                                                                                                                                  | nursing care service                                                                           | <input type="checkbox"/>  | <input type="checkbox"/> | <input type="checkbox"/> | <input type="radio"/>                                                         | <input type="radio"/> | <input type="radio"/> | <input type="radio"/> |
| D03                                                                                                                                                                  | specialised palliative nursing care service                                                    | <input type="checkbox"/>  | <input type="checkbox"/> | <input type="checkbox"/> | <input type="radio"/>                                                         | <input type="radio"/> | <input type="radio"/> | <input type="radio"/> |
| D04                                                                                                                                                                  | further services (outpatient hospice, “Grüne Damen”, caritative visit)                         | <input type="checkbox"/>  | <input type="checkbox"/> | <input type="checkbox"/> | <input type="radio"/>                                                         | <input type="radio"/> | <input type="radio"/> | <input type="radio"/> |
| D05                                                                                                                                                                  | outpatient PKD (palliative care service)                                                       | <input type="checkbox"/>  | <input type="checkbox"/> | <input type="checkbox"/> | <input type="radio"/>                                                         | <input type="radio"/> | <input type="radio"/> | <input type="radio"/> |
| D06                                                                                                                                                                  | specialist with additional qualification in palliative care (qualified palliative physician)   | <input type="checkbox"/>  | <input type="checkbox"/> | <input type="checkbox"/> | <input type="radio"/>                                                         | <input type="radio"/> | <input type="radio"/> | <input type="radio"/> |
| D07                                                                                                                                                                  | (other) physician with BQKPmV-qualification                                                    | <input type="checkbox"/>  | <input type="checkbox"/> | <input type="checkbox"/> | <input type="radio"/>                                                         | <input type="radio"/> | <input type="radio"/> | <input type="radio"/> |
| D08                                                                                                                                                                  | SPHC-team                                                                                      | <input type="checkbox"/>  | <input type="checkbox"/> | <input type="checkbox"/> | <input type="radio"/>                                                         | <input type="radio"/> | <input type="radio"/> | <input type="radio"/> |
| D09                                                                                                                                                                  | palliative care unit                                                                           | <input type="checkbox"/>  | <input type="checkbox"/> | <input type="checkbox"/> | <input type="radio"/>                                                         | <input type="radio"/> | <input type="radio"/> | <input type="radio"/> |
| D10                                                                                                                                                                  | inpatient hospice                                                                              | <input type="checkbox"/>  | <input type="checkbox"/> | <input type="checkbox"/> | <input type="radio"/>                                                         | <input type="radio"/> | <input type="radio"/> | <input type="radio"/> |
| D11                                                                                                                                                                  | homecare companies (caregiver for adjuvants, rehabilitation and pharmaceuticals)               | <input type="checkbox"/>  | <input type="checkbox"/> | <input type="checkbox"/> | <input type="radio"/>                                                         | <input type="radio"/> | <input type="radio"/> | <input type="radio"/> |
| D12                                                                                                                                                                  | <b>Please assess the overall quality of care of the surrounding palliative infrastructure.</b> |                           |                          |                          |                                                                               |                       |                       |                       |

|     |                                                                                                                                   |                                                                                                     |
|-----|-----------------------------------------------------------------------------------------------------------------------------------|-----------------------------------------------------------------------------------------------------|
| E01 | <b>Have you ever referred to SPHC in your work as a general practitioner? Please mark your answer.</b>                            | <input type="checkbox"/> yes <input type="checkbox"/> no<br><b>(If no, please skip to page 4)</b>   |
| E02 | How many referrals of SPHC do you make <u>per year</u> (including follow-up referrals)?                                           | <input type="text"/>                                                                                |
| E03 | How many of your patients get a referral to SPHC from other healthcare providers (hospital/medical specialists) <u>per year</u> ? | <input type="text"/>                                                                                |
| E04 | Do you stay involved in the treatment of your patients after initialising SPHC?                                                   |                                                                                                     |
| E05 | How often do health insurance services reject your referral to SPHC?                                                              | <input type="checkbox"/> <input type="checkbox"/> <input type="checkbox"/> <input type="checkbox"/> |

**Which service do you usually refer to according to form no. 63 (“Muster 63”)?**

**Please mark your answer.** (Multiple selection possible)

|     |                                 |                          |
|-----|---------------------------------|--------------------------|
|     | Consulting                      |                          |
| F01 | a) of the treating physician    | <input type="checkbox"/> |
| F02 | b) of the treating nurse        | <input type="checkbox"/> |
| F03 | c) of the patients/relatives    | <input type="checkbox"/> |
| F04 | Coordination of palliative care | <input type="checkbox"/> |
| F05 | (additional) partial service    | <input type="checkbox"/> |
| F06 | full service                    | <input type="checkbox"/> |

**Which characteristics does the SPHC team you usually work with have?**

**Please mark your answer.**

|     |                                                                                          | unknown                  | yes                      | no                       |
|-----|------------------------------------------------------------------------------------------|--------------------------|--------------------------|--------------------------|
| G01 | SPHC team offers full service                                                            | <input type="checkbox"/> | <input type="checkbox"/> | <input type="checkbox"/> |
| G02 | sufficient admission capacity                                                            | <input type="checkbox"/> | <input type="checkbox"/> | <input type="checkbox"/> |
| G03 | employs different professions in the team (psychologists, social worker, chaplain, etc.) | <input type="checkbox"/> | <input type="checkbox"/> | <input type="checkbox"/> |
| G04 | good material equipment (e.g. analgesics pumps)                                          | <input type="checkbox"/> | <input type="checkbox"/> | <input type="checkbox"/> |
| G05 | availability for telephone advice at any time                                            | <input type="checkbox"/> | <input type="checkbox"/> | <input type="checkbox"/> |
| G06 | regular meetings for case reports with all healthcare professionals                      | <input type="checkbox"/> | <input type="checkbox"/> | <input type="checkbox"/> |
| G07 | further training opportunities for cooperating colleagues                                | <input type="checkbox"/> | <input type="checkbox"/> | <input type="checkbox"/> |
| G08 | medical direction of the SPHC-Team through...                                            | <input type="checkbox"/> |                          |                          |
| G09 | ...hospital doctors                                                                      |                          | <input type="checkbox"/> |                          |
| G10 | ...general practitioners                                                                 |                          | <input type="checkbox"/> |                          |
| G11 | ...outpatient specialists (anaesthetists, oncologist, etc.)                              |                          | <input type="checkbox"/> |                          |
| G12 | settlement of the SPHC-Team...                                                           | <input type="checkbox"/> |                          |                          |
| G13 | ...at a single practice or practice network                                              |                          | <input type="checkbox"/> |                          |
| G14 | ...at a hospital                                                                         |                          | <input type="checkbox"/> |                          |
| G15 | ...at a hospice or outpatient hospice service                                            |                          | <input type="checkbox"/> |                          |
| G16 | ...at a nursing care service                                                             |                          | <input type="checkbox"/> |                          |
| G17 | ...at other institutions (palliative base, network, etc.)                                |                          | <input type="checkbox"/> |                          |

| Palliative care involves a wide spectrum of activities. How often do you take responsibility for the following activities for your palliative patients in their homes? <sup>1</sup> |                                                                                             |                          |                          |                          |                          | For this, how important is an SPHC team/PKD for you? <sup>2</sup> |                       |                       |  |              |           |                |
|-------------------------------------------------------------------------------------------------------------------------------------------------------------------------------------|---------------------------------------------------------------------------------------------|--------------------------|--------------------------|--------------------------|--------------------------|-------------------------------------------------------------------|-----------------------|-----------------------|--|--------------|-----------|----------------|
|                                                                                                                                                                                     |                                                                                             |                          |                          |                          |                          |                                                                   |                       |                       |  | not required | important | very important |
| <b>Assessment and care plan:</b>                                                                                                                                                    |                                                                                             |                          |                          |                          |                          |                                                                   |                       |                       |  |              |           |                |
| H01                                                                                                                                                                                 | perform starting assessment                                                                 | <input type="checkbox"/> | <input type="checkbox"/> | <input type="checkbox"/> | <input type="checkbox"/> | <input type="radio"/>                                             | <input type="radio"/> | <input type="radio"/> |  |              |           |                |
| H02                                                                                                                                                                                 | identify that SPHC is needed                                                                | <input type="checkbox"/> | <input type="checkbox"/> | <input type="checkbox"/> | <input type="checkbox"/> | <input type="radio"/>                                             | <input type="radio"/> | <input type="radio"/> |  |              |           |                |
| H03                                                                                                                                                                                 | give support in the context of patient decree and power of attorney                         | <input type="checkbox"/> | <input type="checkbox"/> | <input type="checkbox"/> | <input type="checkbox"/> | <input type="radio"/>                                             | <input type="radio"/> | <input type="radio"/> |  |              |           |                |
| H04                                                                                                                                                                                 | develop a treatment and emergency plan                                                      | <input type="checkbox"/> | <input type="checkbox"/> | <input type="checkbox"/> | <input type="checkbox"/> | <input type="radio"/>                                             | <input type="radio"/> | <input type="radio"/> |  |              |           |                |
| H05                                                                                                                                                                                 | counsel and guide patients and relatives                                                    | <input type="checkbox"/> | <input type="checkbox"/> | <input type="checkbox"/> | <input type="checkbox"/> | <input type="radio"/>                                             | <input type="radio"/> | <input type="radio"/> |  |              |           |                |
| H06                                                                                                                                                                                 | document/re-evaluate treatment measures                                                     | <input type="checkbox"/> | <input type="checkbox"/> | <input type="checkbox"/> | <input type="checkbox"/> | <input type="radio"/>                                             | <input type="radio"/> | <input type="radio"/> |  |              |           |                |
| <b>Symptom management:</b>                                                                                                                                                          |                                                                                             |                          |                          |                          |                          |                                                                   |                       |                       |  |              |           |                |
| H07                                                                                                                                                                                 | pain                                                                                        | <input type="checkbox"/> | <input type="checkbox"/> | <input type="checkbox"/> | <input type="checkbox"/> | <input type="radio"/>                                             | <input type="radio"/> | <input type="radio"/> |  |              |           |                |
| H08                                                                                                                                                                                 | dyspnoea                                                                                    | <input type="checkbox"/> | <input type="checkbox"/> | <input type="checkbox"/> | <input type="checkbox"/> | <input type="radio"/>                                             | <input type="radio"/> | <input type="radio"/> |  |              |           |                |
| H09                                                                                                                                                                                 | nausea/vomiting, lack of appetite, obstipation                                              | <input type="checkbox"/> | <input type="checkbox"/> | <input type="checkbox"/> | <input type="checkbox"/> | <input type="radio"/>                                             | <input type="radio"/> | <input type="radio"/> |  |              |           |                |
| H10                                                                                                                                                                                 | fatigue, depression, anxiety, delirium                                                      | <input type="checkbox"/> | <input type="checkbox"/> | <input type="checkbox"/> | <input type="checkbox"/> | <input type="radio"/>                                             | <input type="radio"/> | <input type="radio"/> |  |              |           |                |
| <b>Interventions:</b>                                                                                                                                                               |                                                                                             |                          |                          |                          |                          |                                                                   |                       |                       |  |              |           |                |
| H11                                                                                                                                                                                 | identify needs and prescribe pharmaceuticals and devices                                    | <input type="checkbox"/> | <input type="checkbox"/> | <input type="checkbox"/> | <input type="checkbox"/> | <input type="radio"/>                                             | <input type="radio"/> | <input type="radio"/> |  |              |           |                |
| H12                                                                                                                                                                                 | prescribe medication for pain and palliative symptoms                                       | <input type="checkbox"/> | <input type="checkbox"/> | <input type="checkbox"/> | <input type="checkbox"/> | <input type="radio"/>                                             | <input type="radio"/> | <input type="radio"/> |  |              |           |                |
| H13                                                                                                                                                                                 | prescribe medication, pharmaceuticals and devices which heavily burden my budget            | <input type="checkbox"/> | <input type="checkbox"/> | <input type="checkbox"/> | <input type="checkbox"/> | <input type="radio"/>                                             | <input type="radio"/> | <input type="radio"/> |  |              |           |                |
| H14                                                                                                                                                                                 | identify needs and prescribe home care                                                      | <input type="checkbox"/> | <input type="checkbox"/> | <input type="checkbox"/> | <input type="checkbox"/> | <input type="radio"/>                                             | <input type="radio"/> | <input type="radio"/> |  |              |           |                |
| H15                                                                                                                                                                                 | decide on involving nursing care services                                                   | <input type="checkbox"/> | <input type="checkbox"/> | <input type="checkbox"/> | <input type="checkbox"/> | <input type="radio"/>                                             | <input type="radio"/> | <input type="radio"/> |  |              |           |                |
| H16                                                                                                                                                                                 | treat comorbidities/chronic diseases                                                        | <input type="checkbox"/> | <input type="checkbox"/> | <input type="checkbox"/> | <input type="checkbox"/> | <input type="radio"/>                                             | <input type="radio"/> | <input type="radio"/> |  |              |           |                |
| H17                                                                                                                                                                                 | palliative medical wound care                                                               | <input type="checkbox"/> | <input type="checkbox"/> | <input type="checkbox"/> | <input type="checkbox"/> | <input type="radio"/>                                             | <input type="radio"/> | <input type="radio"/> |  |              |           |                |
| H18                                                                                                                                                                                 | artificial nutrition and replacement of fluids                                              | <input type="checkbox"/> | <input type="checkbox"/> | <input type="checkbox"/> | <input type="checkbox"/> | <input type="radio"/>                                             | <input type="radio"/> | <input type="radio"/> |  |              |           |                |
| H19                                                                                                                                                                                 | technical and invasive treatment measures                                                   | <input type="checkbox"/> | <input type="checkbox"/> | <input type="checkbox"/> | <input type="checkbox"/> | <input type="radio"/>                                             | <input type="radio"/> | <input type="radio"/> |  |              |           |                |
| H20                                                                                                                                                                                 | treatment in the final phase                                                                | <input type="checkbox"/> | <input type="checkbox"/> | <input type="checkbox"/> | <input type="checkbox"/> | <input type="radio"/>                                             | <input type="radio"/> | <input type="radio"/> |  |              |           |                |
| H21                                                                                                                                                                                 | reduce/end therapies                                                                        | <input type="checkbox"/> | <input type="checkbox"/> | <input type="checkbox"/> | <input type="checkbox"/> | <input type="radio"/>                                             | <input type="radio"/> | <input type="radio"/> |  |              |           |                |
| <b>Coordination:</b>                                                                                                                                                                |                                                                                             |                          |                          |                          |                          |                                                                   |                       |                       |  |              |           |                |
| H22                                                                                                                                                                                 | coordinate all diagnostic, therapeutic and nursing measures, and caregivers                 | <input type="checkbox"/> | <input type="checkbox"/> | <input type="checkbox"/> | <input type="checkbox"/> | <input type="radio"/>                                             | <input type="radio"/> | <input type="radio"/> |  |              |           |                |
| H23                                                                                                                                                                                 | psychosocial care                                                                           | <input type="checkbox"/> | <input type="checkbox"/> | <input type="checkbox"/> | <input type="checkbox"/> | <input type="radio"/>                                             | <input type="radio"/> | <input type="radio"/> |  |              |           |                |
| H24                                                                                                                                                                                 | involve outpatient hospice service                                                          | <input type="checkbox"/> | <input type="checkbox"/> | <input type="checkbox"/> | <input type="checkbox"/> | <input type="radio"/>                                             | <input type="radio"/> | <input type="radio"/> |  |              |           |                |
| H25                                                                                                                                                                                 | organise specialist visits, transports, and admissions                                      | <input type="checkbox"/> | <input type="checkbox"/> | <input type="checkbox"/> | <input type="checkbox"/> | <input type="radio"/>                                             | <input type="radio"/> | <input type="radio"/> |  |              |           |                |
| H26                                                                                                                                                                                 | (interdisciplinary) case conferences with other involved professionals                      | <input type="checkbox"/> | <input type="checkbox"/> | <input type="checkbox"/> | <input type="checkbox"/> | <input type="radio"/>                                             | <input type="radio"/> | <input type="radio"/> |  |              |           |                |
| H27                                                                                                                                                                                 | perform councils                                                                            | <input type="checkbox"/> | <input type="checkbox"/> | <input type="checkbox"/> | <input type="checkbox"/> | <input type="radio"/>                                             | <input type="radio"/> | <input type="radio"/> |  |              |           |                |
| <b>Availability:</b>                                                                                                                                                                |                                                                                             |                          |                          |                          |                          |                                                                   |                       |                       |  |              |           |                |
| H28                                                                                                                                                                                 | home visits by myself                                                                       | <input type="checkbox"/> | <input type="checkbox"/> | <input type="checkbox"/> | <input type="checkbox"/> | <input type="radio"/>                                             | <input type="radio"/> | <input type="radio"/> |  |              |           |                |
| H29                                                                                                                                                                                 | home visits by own non-medical practice employee                                            | <input type="checkbox"/> | <input type="checkbox"/> | <input type="checkbox"/> | <input type="checkbox"/> | <input type="radio"/>                                             | <input type="radio"/> | <input type="radio"/> |  |              |           |                |
| H30                                                                                                                                                                                 | be available for visits <u>during</u> the opening hours                                     | <input type="checkbox"/> | <input type="checkbox"/> | <input type="checkbox"/> | <input type="checkbox"/> | <input type="radio"/>                                             | <input type="radio"/> | <input type="radio"/> |  |              |           |                |
| H31                                                                                                                                                                                 | be available for visits <u>outside</u> the opening hours (incl. weekends/holidays/at night) | <input type="checkbox"/> | <input type="checkbox"/> | <input type="checkbox"/> | <input type="checkbox"/> | <input type="radio"/>                                             | <input type="radio"/> | <input type="radio"/> |  |              |           |                |
| H32                                                                                                                                                                                 | (only) telephone advice <u>outside</u> the opening hours                                    | <input type="checkbox"/> | <input type="checkbox"/> | <input type="checkbox"/> | <input type="checkbox"/> | <input type="radio"/>                                             | <input type="radio"/> | <input type="radio"/> |  |              |           |                |

| Which conditions would facilitate the palliative care of your patients?<br>Please mark your answer. |                                                                                                     | Don't know               |  |                          |                          |                          |
|-----------------------------------------------------------------------------------------------------|-----------------------------------------------------------------------------------------------------|--------------------------|-------------------------------------------------------------------------------------|--------------------------|--------------------------|--------------------------|
|                                                                                                     |                                                                                                     |                          | strongly disagree                                                                   |                          |                          | strongly agree           |
| J01                                                                                                 | possibilities for immediate advice in palliative questions                                          | <input type="checkbox"/> | <input type="checkbox"/>                                                            | <input type="checkbox"/> | <input type="checkbox"/> | <input type="checkbox"/> |
| J02                                                                                                 | remuneration according to expenses (home visits, counselling by phone, 24-hour care, etc.)          | <input type="checkbox"/> | <input type="checkbox"/>                                                            | <input type="checkbox"/> | <input type="checkbox"/> | <input type="checkbox"/> |
| J03                                                                                                 | available (interdisciplinary) trainings for all healthcare providers                                | <input type="checkbox"/> | <input type="checkbox"/>                                                            | <input type="checkbox"/> | <input type="checkbox"/> | <input type="checkbox"/> |
| J04                                                                                                 | possibility for care coordination and transition management by special trained staff (Case Manager) | <input type="checkbox"/> | <input type="checkbox"/>                                                            | <input type="checkbox"/> | <input type="checkbox"/> | <input type="checkbox"/> |
| J05                                                                                                 | involving bereavement care within the palliative care concept                                       | <input type="checkbox"/> | <input type="checkbox"/>                                                            | <input type="checkbox"/> | <input type="checkbox"/> | <input type="checkbox"/> |
| J06                                                                                                 | standardised exchange of information with all involved healthcare professionals                     | <input type="checkbox"/> | <input type="checkbox"/>                                                            | <input type="checkbox"/> | <input type="checkbox"/> | <input type="checkbox"/> |
| J07                                                                                                 | reinforcement of the hospice culture                                                                | <input type="checkbox"/> | <input type="checkbox"/>                                                            | <input type="checkbox"/> | <input type="checkbox"/> | <input type="checkbox"/> |
| J08                                                                                                 | better perception and coverage of palliative patients' needs in nursing homes                       | <input type="checkbox"/> | <input type="checkbox"/>                                                            | <input type="checkbox"/> | <input type="checkbox"/> | <input type="checkbox"/> |
| J09                                                                                                 | better palliative qualification of outpatient nursing care services                                 | <input type="checkbox"/> | <input type="checkbox"/>                                                            | <input type="checkbox"/> | <input type="checkbox"/> | <input type="checkbox"/> |
| J10                                                                                                 | reinforcement of volunteer work in palliative care                                                  | <input type="checkbox"/> | <input type="checkbox"/>                                                            | <input type="checkbox"/> | <input type="checkbox"/> | <input type="checkbox"/> |
| J11                                                                                                 | establishing "Advanced Care Planning" in palliative care                                            | <input type="checkbox"/> | <input type="checkbox"/>                                                            | <input type="checkbox"/> | <input type="checkbox"/> | <input type="checkbox"/> |
| J12                                                                                                 | building the capacity of SPHC                                                                       | <input type="checkbox"/> | <input type="checkbox"/>                                                            | <input type="checkbox"/> | <input type="checkbox"/> | <input type="checkbox"/> |
| J13                                                                                                 | others, namely:<br>.....<br>.....<br>.....<br>.....<br>.....                                        |                          |                                                                                     |                          |                          |                          |

Thank you for your assistance!
